1      **Response to “No evidence of functional co-adaptation between clustered microRNAs”**

2                                      Yirong Wang<sup>1,2</sup>, Hong Zhang<sup>1</sup>, and Jian Lu<sup>\*,1</sup>

3      1. State Key Laboratory of Protein and Plant Gene Research, Center for Bioinformatics,

4              School of Life Sciences and Peking-Tsinghua Center for Life Sciences, Peking

5              University, Beijing, 100871, China

6      2. Academy for Advanced Interdisciplinary Studies, Peking University, Beijing, 100871,

7              China

8      \*Corresponding author: Jian Lu, [luj@pku.edu.cn](mailto:luj@pku.edu.cn)

9

1 **Abstract**

2 microRNAs (miRNAs) are a class of endogenously expressed small non-coding RNAs that  
3 regulate target genes at the post-transcriptional level. One significant feature of miRNA is that  
4 their genomic locations are often clustered together in the genome. In a previous study (Wang  
5 et al., 2016), we proposed a “functional co-adaptation” model to explain how clustering helps  
6 new miRNAs survive and develop functions during long-term evolution. In a manuscript  
7 recently posted at bioRxiv (doi:10.1101/274811), Marco claimed that he re-analyzed our data  
8 and came to a different conclusion. However, we found his analyses were conducted in an  
9 inappropriate approach. He also claimed that the absence of substitution in highly conserved  
10 miRNAs does not support the "functional co-adaption" model based on the misunderstanding  
11 of our model. In summary, the analyses and claims of Marco, which are flawed, do not refute  
12 our model.

13

14 Keywords: miRNAs, target, functional co-adaptation, drift-draft

15

16

1 miRNAs are a class of endogenously expressed small noncoding RNAs (~22 nt in length) that  
2 down-regulate the expression of target genes at the post-transcriptional level. A salient feature  
3 is that many animal miRNAs are clustered into discrete genomic regions (Lagos-Quintana et  
4 al. 2001; Lau et al. 2001; Lai et al. 2003; Altuvia et al. 2005; J. Graham Ruby et al. 2007; Marco  
5 et al. 2013; Mohammed, Siepel, et al. 2014). The clustering patterns suggest that miRNAs in  
6 the same cluster might be co-transcribed (Baskerville and Bartel 2005; Saini et al. 2007;  
7 Ozsolak et al. 2008; Wang et al. 2009; Ryazansky et al. 2011) and be functionally related by  
8 targeting the same gene or different genes in the same biological pathway (Bartel, 2004; Grun  
9 et al., 2005; Kim and Nam, 2006; Yu et al., 2006). For example, the *mir-17~92* cluster plays  
10 an important role in mammalian development and tumorigenesis (Lu et al., 2007; O'Donnell et  
11 al., 2005; Ventura et al., 2008; Xiao et al., 2008). Gene deletion experiments suggest members  
12 in the *mir-17~92* cluster have essential and overlapping functions (Ventura et al., 2008). The  
13 *mir-106b~93~25* and *mir-222~221* clusters are upregulated and modulate G1/S phase transition  
14 in gastric cancer, and members of the two cluster have functional associations by targeting  
15 genes in the Cip/Kip family members of Cdk inhibitors (Kim et al., 2009). The brain  
16 specifically expressed *mir-379~410* cluster is required for the activity-dependent development  
17 of hippocampal neurons, and multiple miRNAs from the cluster are necessary for the correct  
18 elaboration of the dendritic tree (Fiore et al., 2009). miRNAs in *mir-23a~27a~24-2* cluster also  
19 have cooperative effects in various health and diseased conditions (Chhabra et al., 2010).

20

21 We recently proposed a “functional co-adaptation” model to systematically investigate the  
22 functional relatedness of clustered miRNAs (Wang et al., 2016). We provided several lines of  
23 evidence to support the “functional co-adaptation” model. First, we found the observed number  
24 of genes co-targeted by miRNAs in the same cluster but with different seeds are significantly  
25 higher than the number obtained by random permutations. Second, we found genes targeted by  
26 multiple miRNAs from the same clusters, in general, have lower expression levels than what.  
27 Third, we show that the miRNAs in the same cluster with different seeds tend to target genes  
28 in the same biological pathways. Fourth, we transfected four members of the *mir-17~92* cluster  
29 into human 293FT cells individually and quantified the alteration of mRNA abundance with  
30 deep-sequencing, which verified the overlapping of target genes experimentally. Fifth, we also  
31 experimentally determined the target genes of *miR-92a*, the founding member of the *mir-17~92*  
32 in *Drosophila*, and examined the relationship between the target genes of *miR-92a* in  
33 *Drosophila* and the target genes of the *mir-17~92* cluster in humans. Our experimental results  
34 well supported the “functional co-adaptation” model. Finally, we also conducted evolutionary  
35 analysis to show that positive Darwinian selection drives the evolution of the newly formed  
36 miRNA clusters in both primates and *Drosophila*.

1

2 In a manuscript recently posted at bioRxiv (Marco, 2018; doi:10.1101/274811), Marco claimed  
3 that he re-analyzed our data and found “No evidence of functional co-adaptation between  
4 clustered microRNAs”. Marco claimed that the observed overlap of target genes by the  
5 clustered miRNAs are mostly caused by the similarity between two seed sequences in the *miR-*  
6 *182/183/96* cluster. Marco argued that clustered miRNAs from different miRNA families do  
7 not share more targets than expected by chance after correcting for these factors. Marco also  
8 raised a series of critiques about the “function co-adaptation” model. As we already responded  
9 to Marco’s critique elsewhere, his critiques are based on the analysis that was conducted in an  
10 inappropriate manner, which can be summarized as follows:

11

12 First, Marco misunderstood the “functional co-adaption” model, which led him to make the  
13 argument that “microRNAs in a cluster are primarily under positive selection”. Although our  
14 population genetic analysis suggests Darwinian selection drives the evolution of the newly  
15 formed miRNA clusters in primates and in *Drosophila*, our model does not necessarily suggest  
16 all the clustered miRNAs are driven by positive selection (Wang et al., 2016). What we  
17 proposed is that, new miRNAs originate nearby a pre-existed miRNA would have higher  
18 chance to be maintained in the initial stage of cluster formation due to the tight genetic linkage.  
19 Then positive Darwinian selection might drive the newly emerged miRNAs to develop  
20 functions related to the pre-existed miRNAs in the same cluster or drive the evolution of all the  
21 new miRNAs in the same cluster to develop related functions during the long-term evolution.  
22 Once the cluster is fully established, the miRNAs in the same cluster will be maintained by  
23 purifying selection and become highly conserved after that (Wang et al., 2016). Thus, one could  
24 not expect to observe signature of ongoing positive selection in the well-established clusters  
25 such as the *miR-17~92* or the *miR-182/183/96* cluster which are ancient and conserved after the  
26 establishment, as Marco did. Marco’s observation that “both seed sequences (of *miR-183-5p*  
27 and *miR-96-5p*) have been conserved since their origin and, therefore, there is no evidence of  
28 substitutions happening in the seed of these microRNAs for the last 600 million years” could  
29 not refute our model. Also, he also used the deep conservation of the clustered miRNAs in other  
30 clusters (*mir-106b~25* cluster, *mir-23b~24* cluster, and *mir-379~410* cluster of Fig. S1 in his  
31 manuscript) to argue against the “functional co-adaptation” model. The deep conservation of  
32 the seed sequences as Marco showed can only suggest these miRNAs are conserved due to  
33 extremely strong selective constraints during vertebrate evolution. These observations do not  
34 provide any evidence to defy the “functional co-adaptation” model since one cannot tell  
35 whether the miRNAs have changed since emergence as no outgroup sequence available.

36

1 Second, Marco did not properly conduct the permutation test. The major concern Marco raised  
2 is whether the observed number of genes targeted by at least two conserved miRNAs with  
3 different seeds from the same miRNA clusters is statistically higher than the number obtained  
4 under the assumption of randomness. We found 1,751 human genes were conserved targets of  
5 at least two distinct miRNAs (with different seeds) of the same miRNA cluster (Wang et al.,  
6 2016). The number obtained by Marco was 1,963, which is very similar between these two  
7 studies. However, Marco has conducted biased and flawed permutation test processes, which  
8 generated a pattern that the observed number slightly but still significantly higher than the  
9 expected number under the assumption of randomness ( $P = 0.0359$ ). Since the difference  
10 between the observed and expected numbers are quite smaller obtained by Marco compared to  
11 what we obtained (Wang et al., 2016), Marco argued that the difference observed by Wang et  
12 al. (2016) was caused by the similarity of the targets between two seed sequences of the *mir-*  
13 *183~182* cluster, and “the expected high number of common targets between pairs of  
14 microRNAs that have a large number of targets each”.

15

16 The discrepancy mainly lies in the permutation test procedures. In our previous study (Wang  
17 et al., 2016), to test whether miRNAs in the same clusters tend to regulate overlapping sets of  
18 genes, we obtained expression profiles of miRNAs and mRNAs from five tissues of human  
19 males as determined in previous study (Brawand et al., 2011; Meunier et al., 2013). Since the  
20 co-adaptation of clustered miRNAs is the result of co-evolution between miRNA and target sites,  
21 in the permutation analysis, we first shuffled the co-expressed seed:target pairing (TargetScan  
22  $P_{CT} > 0.5$ ), and then we tested how many genes were targeted by at least two miRNAs (with  
23 distinct seeds) in the same clusters. These permutation tests were performed for 1,000  
24 replicates. By this way, the conservation level and length of 3' UTR of target mRNAs, the  
25 number of miRNAs for each target gene, and the compositions of each miRNA cluster are fully  
26 controlled. Applying this procedure to the pooled dataset of miRNA-mRNA co-expression  
27 from different tissues, the result of Wang et al. was successfully reproduced (Fig. 1). When the  
28 co-expression data of each tissue was analyzed individually, the similar pattern was still  
29 observed (Fig. 1). Importantly, when the *mir-182~183* cluster was excluded, we can still  
30 observe similar patterns (Fig. 2). Therefore, Marco’s argument that “the high overlap between  
31 targets in some clustered miRNAs is actually the random consequence of the similarity between  
32 their seed sequences, and is no associated to whether the miRNAs are clustered or not.” is  
33 invalid. Here, the condition to be tested is whether miRNAs with distinct seeds from the same  
34 cluster have more common target genes than expected under randomness, rather than to test  
35 whether miRNAs are clustered. Marco failed to reproduce our results because he only  
36 shuffled the location of the miRNAs and kept the seed: targeting pairing unaltered.

37

1 Furthermore, it is hard to understand why Marco argued that the targets shared between *miR-*  
2 *183* and *miR-96* in the *mir-183~182* cluster should be excluded in the analysis. The seeds of  
3 *miR-183-5p* and *miR-96-5p* are very similar: AUGGCAC and UUGGCAC for the former and  
4 latter, respectively. However, BLAST2SEQ analysis between the precursor sequences of  
5 human *mir-183* and *mir-96* does not find significant similarity, suggesting these two miRNA  
6 precursors are unlikely to be duplicated miRNAs. Instead, the functional co-adaptation model  
7 might well explain the large number of target genes shared between these two miRNAs: During  
8 long time evolution, the adaptive changes in miRNA seed region or target sites on mRNAs  
9 drive the clustered miRNAs to regulate the same or functionally related genes. Therefore, this  
10 cluster serves as a strong evidence that convergent evolution has occurred between the seeds of  
11 *miR-183* and *miR-96* due to functional coadaptation.

12

13 Curiously, Macro did not report his re-analysis results of the *miR-17~92* cluster over-expression  
14 data we generated (Wang et al., 2016). Many previous studies have demonstrated that the *mir-*  
15 *17~92* cluster plays an important role in tumorigenesis, development of lungs and immune  
16 systems (Lu et al., 2007; O'Donnell et al., 2005; Ventura et al., 2008; Xiao et al., 2008), and  
17 deletion of the *mir-17~92* cluster revealed that miRNAs in this cluster has essential and  
18 overlapping functions (Ventura et al., 2008). Furthermore, we found the conserved target genes  
19 shared between members of the *mir-17~92* cluster is significantly higher than the simulated  
20 ones (Fig. 3). Importantly, we selected four distinct mature miRNAs in the *miR-17~92* cluster  
21 (*miR-17*, *miR-18a*, *miR-19a*, and *miR-92a*) and transfected each miRNA mimic as well as the  
22 miRNA mimic Negative Control (NC) into human 293FT cells (Wang et al., 2016). With high-  
23 throughput mRNA-Seq, we found the predicted target genes (TargetScan  $P_{CT} > 0.5$ ) of each  
24 transfected miRNA are significantly more down-regulated than genes that do not have the target  
25 sites (Figure 4 of Wang et al. 2016). We identified 301, 55, 345 and 268 high-confidence target  
26 genes (TargetScan  $P_{CT} > 0.5$ ) for *miR-17*, *18a*, *19a* and *92a* respectively that were down-  
27 regulated with  $\log_2(\text{FoldChange}) < -0.1$  in the corresponding miRNA transfection experiments  
28 (totally 775 high-confidence genes after removing overlapping genes, Figure 4I of Wang et al.  
29 2016). Among these 775 high-confidence target genes, 172 were targeted by at least two out of  
30 the four miRNAs, significantly higher than the number obtained by randomness ( $P < 0.001$ , see  
31 Figure 4I and Table S8 of Wang et al. 2016 for details). These results well support the  
32 “functional co-adaptation model” we proposed. If there is really “No evidence of functional co-  
33 adaptation between clustered microRNAs” as Macro argued, how can one explain these observed  
34 patterns?

35

1 Based on the observation that *Drosophila* new miRNAs often arose around the pre-existing  
2 ones to form clusters, Marco and colleagues proposed a "drift-draft" model which suggests that  
3 the evolution of miRNA clusters was influenced by tight genetic linkage and largely non-  
4 adaptive (Marco et al., 2013). Under such a model, the motifs of the pre-existing miRNAs  
5 would protect new miRNAs to be transcribed and processed properly since those motifs were  
6 already interacting with the miRNA processing machinery. Thus, the *de novo* formed new  
7 miRNAs are sheltered by the established ones in the same cluster because mutations that abolish  
8 the transcription or processing of the new miRNA will affect the pre-existing ones as well and  
9 are hence selected against. On the other hand, if a *de novo* formed miRNA is located in a  
10 discrete locus, it will have a higher probability to degenerate, either by mutations abolishing its  
11 transcription or by mutations impairing its processing. Although Marco argued the "drift-draft"  
12 and "functional co-adaptation" models are mutually exclusive, we did not think the "functional  
13 co-adaptation" we proposed is strictly "an alternative to the drift-draft model".

14  
15 Our previous results and others suggest that many newly-emerged miRNAs are evolutionarily  
16 transient, with a high birth-and-death rate (Berezikov et al. 2006; Rajagopalan et al. 2006; Lu,  
17 Shen, et al. 2008; Lu et al. 2010). Therefore, it is possible that the newly emerged miRNAs in  
18 the clusters would be sheltered by the pre-existing established miRNAs. However, the  
19 protection effect alone cannot explain why miRNAs in the same cluster have significantly  
20 higher numbers of overlapping target genes. Moreover, many *de novo* formed novel miRNAs  
21 will degenerate even after they are fixed in the populations if they are not maintained by  
22 functional constraints (Berezikov et al. 2006; Lu, Shen, et al. 2008). Thus developing functions  
23 related to the pre-existing miRNAs will help the novel miRNAs to survive and stabilize. The  
24 "functional co-adaptation" model we proposed well account for the evolution and function of  
25 *de novo* formed new miRNAs in the clusters (Figure 2D of Wang et al. 2016). Since miRNAs  
26 in the same clusters are usually co-transcribed temporally or spatially (see below for details),  
27 the newly formed miRNAs might gradually develop functions to target genes that are related  
28 to the pre-existing miRNAs in the same cluster; or multiple *de novo* formed new miRNAs in  
29 the same cluster interplay to regulate overlapping sets of target genes. Therefore, although  
30 miRNAs in the same cluster have independent origins, they might regulate overlapping sets of  
31 target genes through convergent evolution. After that the clustering patterns of miRNAs and  
32 the modular regulation of target genes will be stabilized by natural selection during long-term  
33 evolution. Of course, the evolutionary process of miRNAs is also accompanied by the co-  
34 evolution of the target sites. In a separate study, we also showed the target sites of miRNAs  
35 also experienced frequent births and deaths (Luo et al., 2018). But the evolution of the target  
36 sites alone would not cause the clustering pattern of miRNAs. A plausible scenario is that after  
37 a new miRNA originates in a cluster, the substitutions that change the sequences and expression

1 of the new miRNAs, the interactions between miRNAs in the same cluster, and the co-evolution  
2 between miRNAs and the target sites, jointly affect the evolution of the clustering pattern of  
3 miRNAs.

4

5 Understanding the molecular mechanisms and evolutionary principles of the miRNA clustering  
6 would deepen our understanding of the regulatory roles of miRNAs in various biological  
7 processes or diseases. The "functional co-adaptation" model we propose is well supported by  
8 evolutionary and functional genomic data.

9

10

## 11 **Reference**

12

13 Bartel, D.P., 2004. MicroRNAs: genomics, biogenesis, mechanism, and function. *Cell*, 116(2): 281-97.

14 Brawand, D. et al., 2011. The evolution of gene expression levels in mammalian organs. *Nature*,  
15 478(7369): 343-8.

16 Chhabra, R., Dubey, R. and Saini, N., 2010. Cooperative and individualistic functions of the microRNAs  
17 in the miR-23a~27a~24-2 cluster and its implication in human diseases. *Mol Cancer*, 9: 232.

18 Fiore, R. et al., 2009. Mef2-mediated transcription of the miR379-410 cluster regulates activity-  
19 dependent dendritogenesis by fine-tuning Pumilio2 protein levels. *EMBO J*, 28(6): 697-710.

20 Grun, D., Wang, Y.L., Langenberger, D., Gunsalus, K.C. and Rajewsky, N., 2005. microRNA target  
21 predictions across seven *Drosophila* species and comparison to mammalian targets. *PLoS*  
22 *Comput Biol*, 1(1): e13.

23 Kim, V.N., Han, J. and Siomi, M.C., 2009. Biogenesis of small RNAs in animals. *Nat Rev Mol Cell Biol*,  
24 10(2): 126-39.

25 Kim, V.N. and Nam, J.W., 2006. Genomics of microRNA. *Trends Genet*, 22(3): 165-73.

26 Lu, Y., Thomson, J.M., Wong, H.Y., Hammond, S.M. and Hogan, B.L., 2007. Transgenic over-expression  
27 of the microRNA miR-17-92 cluster promotes proliferation and inhibits differentiation of lung  
28 epithelial progenitor cells. *Dev Biol*, 310(2): 442-53.

29 Luo, J., Wang, Y., Yuan, J., Zhao, Z. and Lu, J., 2018. MicroRNA duplication accelerates the recruitment  
30 of new targets during vertebrate evolution. *RNA*.

31 Marco, A., Ninova, M., Ronshaugen, M. and Griffiths-Jones, S., 2013. Clusters of microRNAs emerge  
32 by new hairpins in existing transcripts. *Nucleic Acids Res*, 41(16): 7745-52.

33 Meunier, J. et al., 2013. Birth and expression evolution of mammalian microRNA genes. *Genome Res*,  
34 23(1): 34-45.

35 O'Donnell, K.A., Wentzel, E.A., Zeller, K.I., Dang, C.V. and Mendell, J.T., 2005. c-Myc-regulated



- 1           microRNAs modulate E2F1 expression. *Nature*, 435(7043): 839-43.
- 2   Ventura, A. et al., 2008. Targeted deletion reveals essential and overlapping functions of the miR-17
- 3           through 92 family of miRNA clusters. *Cell*, 132(5): 875-86.
- 4   Wang, Y., Luo, J., Zhang, H. and Lu, J., 2016. microRNAs in the Same Clusters Evolve to Coordinately
- 5           Regulate Functionally Related Genes. *Mol Biol Evol*, 33(9): 2232-47.
- 6   Xiao, C. et al., 2008. Lymphoproliferative disease and autoimmunity in mice with increased miR-17-92
- 7           expression in lymphocytes. *Nat Immunol*, 9(4): 405-14.
- 8   Yu, J. et al., 2006. Human microRNA clusters: genomic organization and expression profile in leukemia
- 9           cell lines. *Biochem Biophys Res Commun*, 349(1): 59-68.
- 10
- 11

## 1 Figures

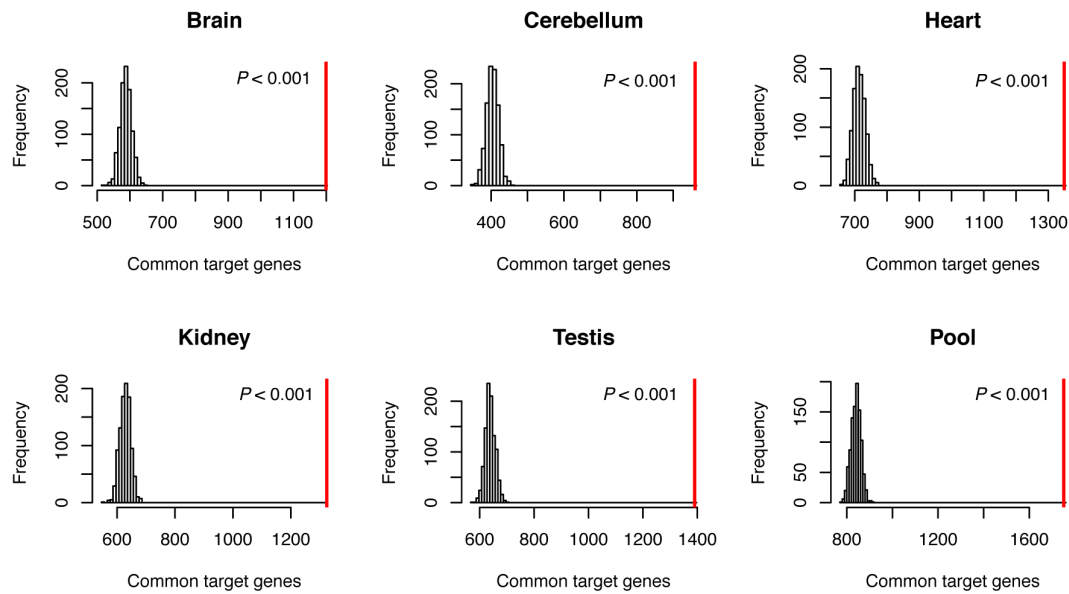

2

3 **Figure 1.** Permutation analysis of common target genes of miRNAs from the same cluster in  
4 each tissue or pooled data by shuffling co-expressed seed:target pairs. 1,000 replicates were  
5 performed for each panel. The observed number of common targets was indicated with  
6 vertical red line and the proportion of simulations yielding a number larger than observed  
7 value was shown at top right.

8

9

10

11

12

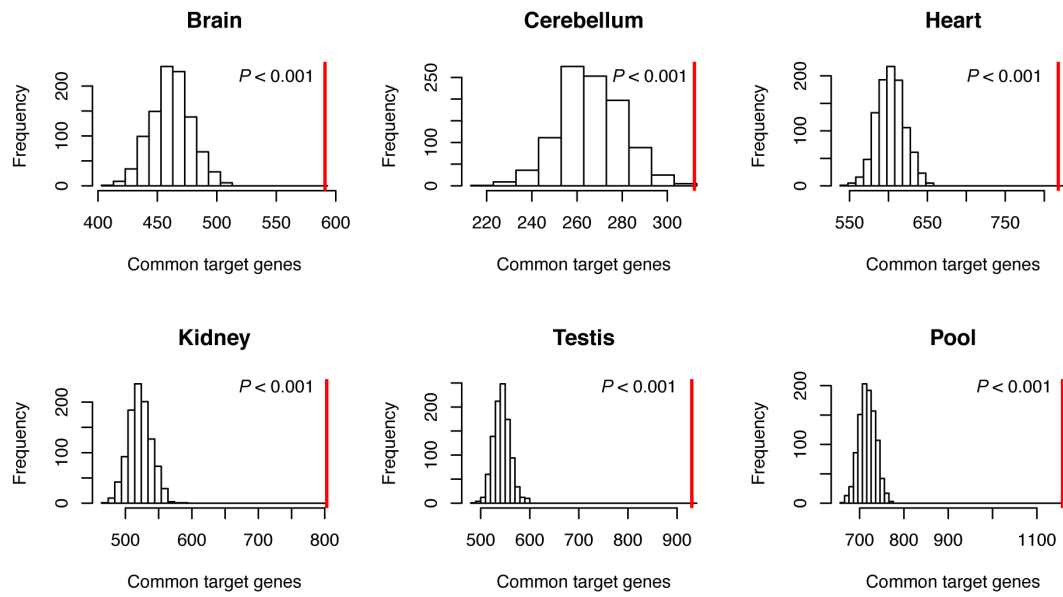

1

2 **Figure 2.** Permutation analysis of common target genes of miRNAs from the same cluster in  
3 each tissue or pooled data by shuffling co-expressed seed:target pairs. Similar as Fig. 1 but *mir-*  
4 *183~182* cluster was excluded in the analysis.

5

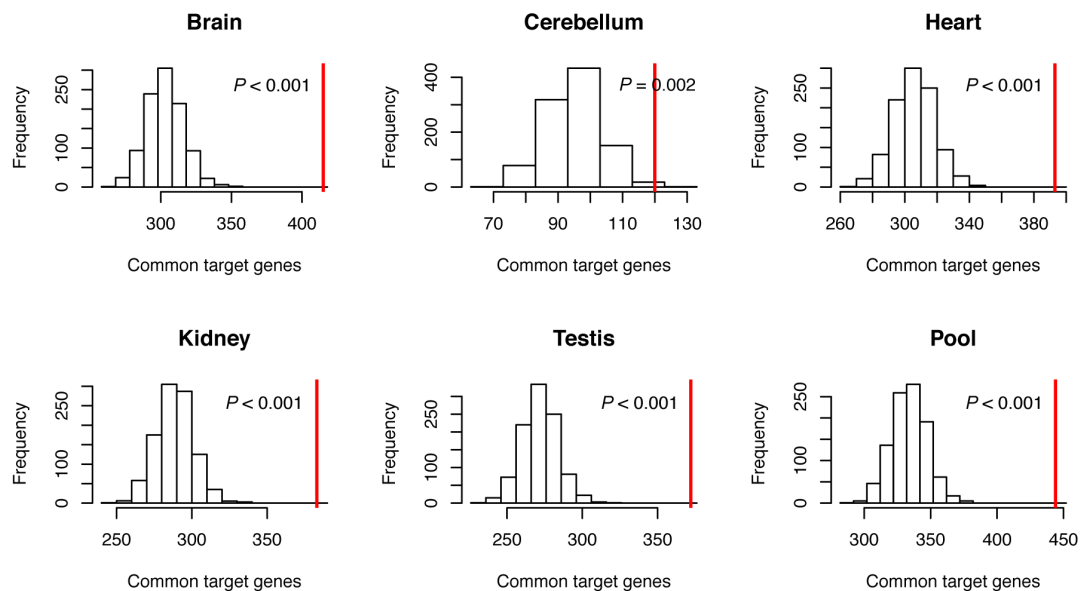

6

7 **Figure 3.** The number of observed (red) and simulated common target genes of conserved  
8 miRNAs in *mir-17~92* cluster in the permutation analysis of Fig. 1.
