1     **Response to “No evidence of functional co-adaptation between clustered microRNAs”**

2                                   Yirong Wang<sup>1</sup>, Hong Zhang<sup>1</sup>, and Jian Lu<sup>\*1</sup>

3     1. State Key Laboratory of Protein and Plant Gene Research, Center for Bioinformatics,

4         School of Life Sciences and Peking-Tsinghua Center for Life Sciences, Peking

5         University, Beijing, 100871, China

6

7     \*Corresponding author: Jian Lu, [luj@pku.edu.cn](mailto:luj@pku.edu.cn)

8

1 **Abstract**

2 microRNAs (miRNAs) are a class of endogenously expressed small non-coding RNAs that  
3 regulate target genes at the post-transcriptional level. One significant feature of miRNA is that  
4 their genomic locations are often clustered together in the genome. In a previous study (Wang,  
5 et al. 2016), we proposed a “functional co-adaptation” model to explain how clustering helps  
6 new miRNAs survive and develop functions during long-term evolution. In a manuscript  
7 recently posted at bioRxiv (doi:10.1101/274811), Marco claimed that he re-analyzed our data  
8 and came to a different conclusion. However, we found his analyses were conducted in an  
9 inappropriate approach. He also claimed that the absence of substitution in highly conserved  
10 miRNAs does not support the "functional co-adaption" model based on the misunderstanding  
11 of our model. In summary, the analyses and claims of Marco, which are flawed, do not refute  
12 our model.

13

14 Keywords: miRNAs, target, functional co-adaptation, drift-draft

15

16

1 miRNAs are a class of endogenously expressed small noncoding RNAs (~22 nt in length) that  
2 down-regulate the expression of target genes at the post-transcriptional level. A salient feature  
3 is that many animal miRNAs are clustered into discrete genomic regions (Lagos-Quintana et  
4 al. 2001; Lau et al. 2001; Lai et al. 2003; Altuvia et al. 2005; J. Graham Ruby et al. 2007; Marco  
5 et al. 2013; Mohammed, Siepel, et al. 2014). The clustering patterns suggest that miRNAs in  
6 the same cluster might be co-transcribed (Baskerville and Bartel 2005; Saini et al. 2007;  
7 Ozsolak et al. 2008; Wang et al. 2009; Ryazansky et al. 2011) and be functionally related by  
8 targeting the same gene or different genes in the same biological pathway (Bartel 2004; Grun,  
9 et al. 2005; Kim and Nam 2006; Yu, et al. 2006). For example, the *mir-17~92* cluster plays an  
10 important role in mammalian development and tumorigenesis (O'Donnell, et al. 2005; Lu, et al.  
11 2007; Ventura, et al. 2008; Xiao, et al. 2008). Gene deletion experiments suggest members in  
12 the *mir-17~92* cluster have essential and overlapping functions (Ventura, et al. 2008). The *mir-*  
13 *106b~93~25* and *mir-222~221* clusters are upregulated and modulate G1/S phase transition in  
14 gastric cancer, and members of the two cluster have functional associations by targeting genes  
15 in the Cip/Kip family members of Cdk inhibitors (Kim, et al. 2009). The brain specifically  
16 expressed *mir-379~410* cluster is required for the activity-dependent development of  
17 hippocampal neurons, and multiple miRNAs from the cluster are necessary for the correct  
18 elaboration of the dendritic tree (Fiore, et al. 2009). miRNAs in *mir-23a~27a~24-2* cluster also  
19 have cooperative effects in various health and diseased conditions (Chhabra, et al. 2010).

20  
21 We recently proposed a “functional co-adaptation” model to systematically investigate the  
22 functional relatedness of clustered miRNAs (Wang, et al. 2016). We provided several lines of  
23 evidence to support the “functional co-adaptation” model. First, we found the observed number  
24 of genes co-targeted by miRNAs in the same cluster but with different seeds are significantly  
25 higher than the number obtained by random permutations. Second, we found genes targeted by  
26 multiple miRNAs from the same clusters, in general, have lower expression levels than genes  
27 targeted by multiple miRNAs from distinct clusters. Third, we show that the miRNAs in the  
28 same cluster with different seeds tend to target genes in the same biological pathways. Fourth,  
29 we transfected four members of the *mir-17~92* cluster into human 293FT cells individually and  
30 quantified the alteration of mRNA abundance with deep-sequencing, which verified the  
31 overlapping of target genes experimentally. Fifth, we experimentally determined the target  
32 genes of *miR-92a*, the founding member of the *mir-17~92* in *Drosophila*, and examined the  
33 relationship between the target genes of *miR-92a* in *Drosophila* and the target genes of the *mir-*  
34 *17~92* cluster in humans. Our experimental results well supported the “functional co-adaptation”  
35 model. Finally, we also conducted evolutionary analysis to show that positive Darwinian

1 selection drives the evolution of the newly formed miRNA clusters in both primates and  
2 *Drosophila*.

3

4 In a manuscript recently posted at bioRxiv (Marco, 2018; doi:10.1101/274811), Marco claimed  
5 that he re-analyzed our data and found “No evidence of functional co-adaptation between  
6 clustered microRNAs”. Marco claimed that the observed overlap of target genes by the  
7 clustered miRNAs are mostly caused by the similarity between two seed sequences in the *miR-*  
8 *182/183/96* cluster. Marco argued that clustered miRNAs from different miRNA families do  
9 not share more targets than expected by chance after correcting for these factors. Marco also  
10 argued that our permutation tests by shuffling miRNA-target interactions would lead to spuriously  
11 low  $P$  values. Moreover, Marco also raised a series of other critiques about the “function co-  
12 adaptation” model in different versions of his comments. Unfortunately, Marco’s critiques are  
13 based on flawed analysis and misled concept of miRNA evolution, which are summarized as  
14 follows.

15

16 The major concern Marco raised is whether the observed number of genes targeted by at least  
17 two conserved miRNAs with different seeds from the same miRNA clusters is statistically  
18 higher than the number obtained under the assumption of randomness. We found 1,751 human  
19 genes were conserved targets of at least two distinct miRNAs (with different seeds) of the same  
20 miRNA cluster (Wang, et al. 2016). The number obtained by Marco was 1,963, which is much  
21 larger than the number we obtained (Wang, et al. 2016). Unfortunately, this difference was  
22 caused by the fact that Marco ignored the co-expression of miRNAs and target genes in a human  
23 tissue which was considered in our previous study (Wang, et al. 2016). With the code and data  
24 provided by Marco (<https://doi.org/10.6084/m9.figshare.6165722>), Marco parsed the co-  
25 expression information in the simulation and stored it in a hash named “%COEXP” that was  
26 actually never used in the downstream analysis. After fixing this error, we got an observed  
27 number of common target genes of 1,752 (1,041 after excluding *miR-182/183/96*), which is  
28 nearly identical to that in our original study (Wang, et al. 2016).

29

30 The biggest discrepancy lies in the permutation test procedures. In our previous study (Wang,  
31 et al. 2016), to test whether miRNAs in the same clusters tend to regulate overlapping sets of  
32 genes, we obtained expression profiles of miRNAs and mRNAs from five tissues of human  
33 males as determined in previous study (Brawand, et al. 2011; Meunier, et al. 2013). Since the  
34 co-adaptation of clustered miRNAs is the result of co-evolution between miRNA and target sites,  
35 in the permutation analysis, we first shuffled the co-expressed seed:target pairing (TargetScan  
36  $P_{CT} > 0.5$ ), and then we tested how many genes were targeted by at least two miRNAs (with  
37 distinct seeds) in the same clusters. These permutation tests were performed for 1,000 replicates.

1 By this way, the conservation level and length of 3' UTR of target mRNAs, the number of  
2 miRNAs for each target gene, and the compositions of each miRNA cluster are fully controlled.  
3 Applying this procedure to the pooled dataset of miRNA-mRNA co-expression from different  
4 tissues, the result of Wang et al. was successfully reproduced (Fig. 1). When the co-expression  
5 data of each tissue was analyzed individually, the similar pattern was still observed (Fig. 1).  
6 Importantly, when the *miR-182/183/96* cluster was excluded, we can still observe similar  
7 patterns (Fig. 2).

8

9 By contrast, Marco failed to reproduce our results because he only shuffled the location of the  
10 miRNAs and kept the seed: targeting pairing unaltered. Marco obtained a pattern that the  
11 observed number slightly but still significantly higher than the expected number under the  
12 assumption of randomness ( $P = 0.0359$ ). Since the difference between the observed and  
13 expected numbers are quite smaller obtained by Marco compared to what we obtained (Wang,  
14 et al. 2016), Marco argued that our results are mainly caused by the similarity of the targets  
15 between two seed sequences of the *miR-182/183/96* cluster, and “the expected high number of  
16 common targets between pairs of microRNAs that have a large number of targets each”.  
17 However, Marco’s permutation tests are biased and flawed. Here, the condition to be tested is  
18 whether miRNAs with distinct seeds from the same cluster have more common target genes  
19 than expected under randomness, rather than to test whether miRNAs are clustered as Marco  
20 conducted.

21

22 Marco also argued that the differences between clustered and non-clustered miRNAs are not  
23 significant when he only focused on the pairs of miRNAs that have fewer than 6 common  
24 nucleotides at seed regions in a cluster (the Fig. 1C of (Marco 2018)). He argued that the  
25 observed overlap between targets in some clustered miRNAs is actually the random  
26 consequence of the similarity between their seed sequences, and is not associated with whether  
27 the miRNAs are clustered or not. An inspection of his code indicates his critique is based on  
28 incorrect calculation of “the fraction of common targets” for a pair of miRNAs. For example,  
29 let us suppose that miRA has  $x$  targets, miRB has  $y$  targets, and  $z$  targets are shared between  
30 miRA and miRB. Marco calculated the fraction of common targets as  $z/\min(x,y)$  in his Fig. 1C,  
31 while calculated the fraction of common targets as  $z(x+y)/(2xy)$  in his Fig. 1D. Obviously, using  
32 the harmonic mean ( $z(x+y)/(2xy)$ ) is more appropriate to calculate the fraction of common  
33 targets, as employed by Marco in his Fig. 1D. Interestingly, when we repeated his analysis in  
34 Fig. 1C with the harmonic mean ( $z(x+y)/(2xy)$ ) approach as he did in Fig. 1D, we found a pair  
35 of miRNAs with seed similarity less than 6 nucleotides have a significantly higher fraction of  
36 common targets if the two paired miRNAs are from the same miRNA cluster ( $P = 0.008$ , Fig.

1 3). Therefore, the results in the Fig. 1C of (Marco 2018) are based on incorrect analytical  
2 procedures.

3  
4 Notably, both our original analysis (Wang, et al. 2016) and Marco (2018) only considered the  
5 evolutionarily conserved target sites of the evolutionarily conserved miRNAs (only miRNAs  
6 that have target sites with TargetScan  $P_{CT} > 0.5$  were used in the permutation analyses). Here  
7 we considered all the miRNAs that have at least one target site (not necessarily conserved) with  
8 weighted context++ score (WCC)  $< -0.3$  (Grimson, et al. 2007; Agarwal, et al. 2015). Target  
9 sites with WCC  $< -0.3$  are usually located in optimized genomic context for efficient repression  
10 of target mRNAs. With the criteria of WCC  $< -0.3$ , only 125 (6%) of 2,081 common targets of  
11 clustered miRNAs are contributed by *miR-182/183/96*, which would remarkably reduce the  
12 potential bias caused by *miR-182/183/96*. We consistently observed that clustered miRNAs  
13 have significantly more common target genes than expected before (empirical  $P = 0.0037$ , Fig.  
14 4A) or after (empirical  $P = 0.0088$ , Fig. 4B) excluding *miR-182/183/96* cluster in the  
15 permutation tests by shuffling miRNA loci as Marco performed. A more significant trend was  
16 observed when the permutation tests were performed by shuffling co-expressed seed: target  
17 pairs ( $P < 0.0001$  in both Fig. 4C and 4D) as conducted in our original study (Wang, et al.  
18 2016). Therefore, we reaffirmed the thesis that clustered miRNAs have more common target  
19 genes than expected using miRNA targets with WCC  $< -0.3$ .

20  
21 Furthermore, it is hard to understand why Marco argued that the targets shared between *miR-*  
22 *183* and *miR-96* in the *miR-182/183/96* cluster should be excluded from the analysis. The seeds  
23 of *miR-183-5p* and *miR-96-5p* are very similar: AUGGCAC and UUGGCAC for the former  
24 and latter, respectively. However, BLAST2SEQ analysis between the precursor sequences of  
25 human *mir-183* and *mir-96* does not find significant similarity, suggesting these two miRNA  
26 precursors are unlikely to be duplicated miRNAs. Instead, the functional co-adaptation model  
27 might well explain the large number of target genes shared between these two miRNAs: During  
28 long time evolution, the adaptive changes in miRNA seed region or target sites on mRNAs  
29 drive the clustered miRNAs to regulate the same or functionally related genes. Therefore, this  
30 cluster serves as a strong evidence that convergent evolution has occurred between the seeds of  
31 *miR-183* and *miR-96* due to functional coadaptation.

32  
33 Curiously, Marco did not report his re-analysis results of the *miR-17~92* cluster over-expression  
34 data we generated (Wang, et al. 2016). Many previous studies have demonstrated that the *mir-*  
35 *17~92* cluster plays an important role in tumorigenesis, development of lungs and immune  
36 systems (O'Donnell, et al. 2005; Lu, et al. 2007; Ventura, et al. 2008; Xiao, et al. 2008), and

1 deletion of the *mir-17~92* cluster revealed that miRNAs in this cluster have essential and  
2 overlapping functions (Ventura, et al. 2008). Furthermore, we found the conserved target genes  
3 shared between members of the *mir-17~92* cluster is significantly higher than the simulated  
4 ones (Fig. 5). Importantly, we selected four distinct mature miRNAs in the *miR-17~92* cluster  
5 (*miR-17*, *miR-18a*, *miR-19a*, and *miR-92a*) and transfected each miRNA mimic as well as the  
6 miRNA mimic Negative Control (NC) into human 293FT cells (Wang, et al. 2016). With high-  
7 throughput mRNA-Seq, we found the predicted target genes (TargetScan  $P_{CT} > 0.5$ ) of each  
8 transfected miRNA are significantly more down-regulated than genes that do not have the target  
9 sites (Figure 4 of Wang et al. 2016). We identified 301, 55, 345 and 268 high-confidence target  
10 genes (TargetScan  $P_{CT} > 0.5$ ) for *miR-17*, *18a*, *19a* and *92a* respectively that were down-  
11 regulated with  $\log_2(\text{FoldChange}) < -0.1$  in the corresponding miRNA transfection experiments  
12 (totally 775 high-confidence genes after removing overlapping genes, Figure 4I of Wang et al.  
13 2016). Among these 775 high-confidence target genes, 172 were targeted by at least two out of  
14 the four miRNAs, significantly higher than the number obtained by randomness ( $P < 0.001$ , see  
15 Figure 4I and Table S8 of Wang et al. 2016 for details). These results well support the  
16 “functional co-adaptation model” we proposed. If there is really “No evidence of functional co-  
17 adaptation between clustered microRNAs” as Marco argued, how can one explain these observed  
18 patterns?

19

20 Moreover, Marco did not fully understand the “functional co-adaption” model, which led him  
21 to make the argument that “microRNAs in a cluster are primarily under positive selection”  
22 (April/20/2018 version of doi:10.1101/274811). Although our population genetic analysis  
23 suggests Darwinian selection drives the evolution of the newly formed miRNA clusters in  
24 primates and in *Drosophila*, our model does not necessarily suggest all the clustered miRNAs  
25 are driven by positive selection (Wang, et al. 2016). What we proposed is that, new miRNAs  
26 originating nearby a pre-existed miRNA would have a higher chance to be maintained in the  
27 initial stage of cluster formation due to the tight genetic linkage. Then positive Darwinian  
28 selection might drive the newly emerged miRNAs to develop functions related to the pre-  
29 existing miRNAs in the same cluster or drive the evolution of all the new miRNAs in the same  
30 cluster to develop related functions during the long-term evolution. Once the cluster is fully  
31 established, the miRNAs in the same cluster will be maintained by purifying selection and  
32 become highly conserved after that (Wang, et al. 2016). Thus, one could not expect to observe  
33 signature of ongoing positive selection in the well-established clusters such as the *miR-17~92*  
34 or the *miR-182/183/96* cluster which are ancient and conserved after the establishment, as  
35 Marco did. Marco’s observation that “both seed sequences (of *miR-183-5p* and *miR-96-5p*)  
36 have been conserved since their origin and, therefore, there is no evidence of substitutions



1 happening in the seed of these microRNAs for the last 600 million years” could not refute our  
2 model. Marco also used the deep conservation of the clustered miRNAs in other clusters (*mir-*  
3 *106b~25* cluster, *mir-23b~24* cluster, and *mir-379~410* cluster of Fig. S1 in the April/20/2018  
4 version of his manuscript) to argue against the “functional co-adaptation” model. The deep  
5 conservation of the seed sequences as Marco showed can only suggest these miRNAs are  
6 conserved due to extremely strong selective constraints during vertebrate evolution. These  
7 observations do not provide any evidence to defy the “functional co-adaptation” model since  
8 one cannot tell whether the miRNAs have changed since emergence as no outgroup sequence  
9 available.

10

11 Based on the observation that *Drosophila* new miRNAs often arose around the pre-existing  
12 ones to form clusters, Marco and colleagues proposed a "drift-draft" model which suggests that  
13 the evolution of miRNA clusters was influenced by tight genetic linkage and largely non-  
14 adaptive (Marco, et al. 2013). Under such a model, the motifs of the pre-existing miRNAs  
15 would protect new miRNAs to be transcribed and processed properly since those motifs were  
16 already interacting with the miRNA processing machinery. Thus, the *de novo* formed new  
17 miRNAs are sheltered by the established ones in the same cluster because mutations that abolish  
18 the transcription or processing of the new miRNA will affect the pre-existing ones as well and  
19 are hence selected against. On the other hand, if a *de novo* formed miRNA is located in a  
20 discrete locus, it will have a higher probability to degenerate, either by mutations abolishing its  
21 transcription or by mutations impairing its processing. Although Marco argued the “drift-draft”  
22 and “functional co-adaptation” models are mutually exclusive, we did not think the “functional  
23 co-adaptation” we proposed is strictly “an alternative to the drift-draft model”.

24

25 Our previous results and others suggest that many newly-emerged miRNAs are evolutionarily  
26 transient, with a high birth-and-death rate (Berezikov et al. 2006; Rajagopalan et al. 2006; Lu,  
27 Shen, et al. 2008; Lu et al. 2010). Therefore, it is possible that the newly emerged miRNAs in  
28 the clusters would be sheltered by the pre-existing established miRNAs. However, the  
29 protection effect alone cannot explain why miRNAs in the same cluster have significantly  
30 higher numbers of overlapping target genes. Moreover, many *de novo* formed novel miRNAs  
31 will degenerate even after they are fixed in the populations if they are not maintained by  
32 functional constraints (Berezikov et al. 2006; Lu, Shen, et al. 2008). Thus developing functions  
33 related to the pre-existing miRNAs will help the novel miRNAs to survive and stabilize. The  
34 “functional co-adaptation” model we proposed well accounts for the evolution and function of  
35 *de novo* formed new miRNAs in the clusters (Figure 2D of Wang et al. 2016). Since miRNAs  
36 in the same clusters are usually co-transcribed temporally or spatially (see below for details),



1 the newly formed miRNAs might gradually develop functions to target genes that are related  
2 to the pre-existing miRNAs in the same cluster; or multiple *de novo* formed new miRNAs in  
3 the same cluster interplay to regulate overlapping sets of target genes. Therefore, although  
4 miRNAs in the same cluster have independent origins, they might regulate overlapping sets of  
5 target genes through convergent evolution. After that, the clustering patterns of miRNAs and  
6 the modular regulation of target genes will be stabilized by natural selection during long-term  
7 evolution. Of course, the evolutionary process of miRNAs is also accompanied by the co-  
8 evolution of the target sites, which might also potentially affect the base compositions or even  
9 the length of a 3' UTR. In a separate study, we also showed the target sites of miRNAs also  
10 experienced frequent births and deaths (Luo, et al. 2018). But the evolution of the target sites  
11 alone would not cause the clustering pattern of miRNAs. A plausible scenario is that after a  
12 new miRNA originates in a cluster, the substitutions that change the sequences and expression  
13 of the new miRNAs, the interactions between miRNAs in the same cluster, and the co-evolution  
14 between miRNAs and the target sites or the 3' UTRs, jointly affect the evolution of the  
15 clustering pattern of miRNAs.

16

17 Understanding the molecular mechanisms and evolutionary principles of the miRNA clustering  
18 would deepen our understanding of the regulatory roles of miRNAs in various biological  
19 processes or diseases. The "functional co-adaptation" model we propose is well supported by  
20 evolutionary and functional genomic data.

21

22

## 23 **References**

24

25 Agarwal V, Bell GW, Nam JW, Bartel DP. 2015. Predicting effective microRNA target sites in  
26 mammalian mRNAs. *Elife* 4.

27 Bartel DP. 2004. MicroRNAs: genomics, biogenesis, mechanism, and function. *Cell* 116:281-  
28 297.

29 Brawand D, Soumillon M, Necsulea A, Julien P, Csardi G, Harrigan P, Weier M, Liechti A,  
30 Aximu-Petri A, Kircher M, et al. 2011. The evolution of gene expression levels in mammalian  
31 organs. *Nature* 478:343-348.

32 Chhabra R, Dubey R, Saini N. 2010. Cooperative and individualistic functions of the  
33 microRNAs in the miR-23a~27a~24-2 cluster and its implication in human diseases. *Mol*  
34 *Cancer* 9:232.

35 Fiore R, Khudayberdiev S, Christensen M, Siegel G, Flavell SW, Kim TK, Greenberg ME,  
36 Schratt G. 2009. Mef2-mediated transcription of the miR379-410 cluster regulates activity-

- 1 dependent dendritogenesis by fine-tuning Pumilio2 protein levels. *EMBO J* 28:697-710.
- 2 Grimson A, Farh KK-H, Johnston WK, Garrett-Engele P, Lim LP, Bartel DP. 2007. MicroRNA  
3 Targeting Specificity in Mammals: Determinants beyond Seed Pairing. *Molecular Cell* 27:91-  
4 105.
- 5 Grun D, Wang YL, Langenberger D, Gunsalus KC, Rajewsky N. 2005. microRNA target  
6 predictions across seven *Drosophila* species and comparison to mammalian targets. *PLoS*  
7 *Comput Biol* 1:e13.
- 8 Kim VN, Han J, Siomi MC. 2009. Biogenesis of small RNAs in animals. *Nat Rev Mol Cell*  
9 *Biol* 10:126-139.
- 10 Kim VN, Nam JW. 2006. Genomics of microRNA. *Trends Genet* 22:165-173.
- 11 Lu Y, Thomson JM, Wong HY, Hammond SM, Hogan BL. 2007. Transgenic over-expression  
12 of the microRNA miR-17-92 cluster promotes proliferation and inhibits differentiation of lung  
13 epithelial progenitor cells. *Dev Biol* 310:442-453.
- 14 Luo J, Wang Y, Yuan J, Zhao Z, Lu J. 2018. MicroRNA duplication accelerates the recruitment  
15 of new targets during vertebrate evolution. *RNA*.
- 16 Marco A. 2018. No evidence of functional co-adaptation between clustered microRNAs.  
17 bioRxiv.
- 18 Marco A, Ninova M, Ronshaugen M, Griffiths-Jones S. 2013. Clusters of microRNAs emerge  
19 by new hairpins in existing transcripts. *Nucleic Acids Res* 41:7745-7752.
- 20 Meunier J, Lemoine F, Soumillon M, Liechti A, Weier M, Guschanski K, Hu H, Khaitovich P,  
21 Kaessmann H. 2013. Birth and expression evolution of mammalian microRNA genes. *Genome*  
22 *Res* 23:34-45.
- 23 O'Donnell KA, Wentzel EA, Zeller KI, Dang CV, Mendell JT. 2005. c-Myc-regulated  
24 microRNAs modulate E2F1 expression. *Nature* 435:839-843.
- 25 Ventura A, Young AG, Winslow MM, Lintault L, Meissner A, Erkeland SJ, Newman J,  
26 Bronson RT, Crowley D, Stone JR, et al. 2008. Targeted deletion reveals essential and  
27 overlapping functions of the miR-17 through 92 family of miRNA clusters. *Cell* 132:875-886.
- 28 Wang Y, Luo J, Zhang H, Lu J. 2016. microRNAs in the Same Clusters Evolve to Coordinately  
29 Regulate Functionally Related Genes. *Mol Biol Evol* 33:2232-2247.
- 30 Xiao C, Srinivasan L, Calado DP, Patterson HC, Zhang B, Wang J, Henderson JM, Kutok JL,  
31 Rajewsky K. 2008. Lymphoproliferative disease and autoimmunity in mice with increased  
32 miR-17-92 expression in lymphocytes. *Nat Immunol* 9:405-414.
- 33 Yu J, Wang F, Yang GH, Wang FL, Ma YN, Du ZW, Zhang JW. 2006. Human microRNA

- 1 clusters: genomic organization and expression profile in leukemia cell lines. *Biochem Biophys Res Commun* 349:59-68.
- 2
- 3
- 4

## 1 Figures

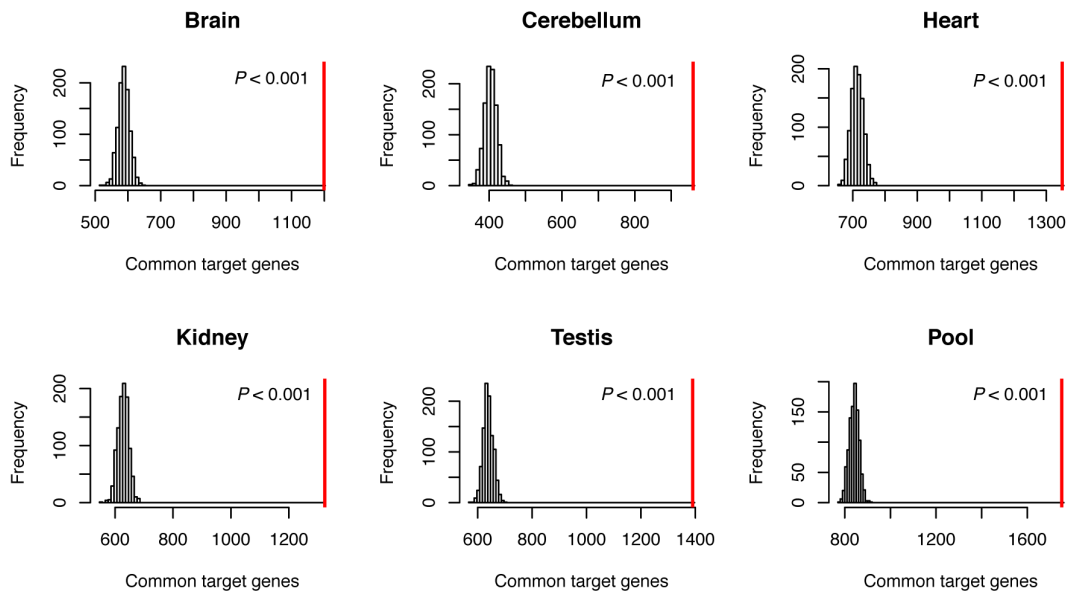

2

3 **Figure 1.** Permutation analysis of common target genes of miRNAs from the same cluster in  
4 each tissue or pooled data by shuffling co-expressed seed:target pairs. 1,000 replicates were  
5 performed for each panel. The observed number of common targets was indicated with  
6 vertical red line and the proportion of simulations yielding a number larger than observed  
7 value was shown at top right.

8

9

10

11

12

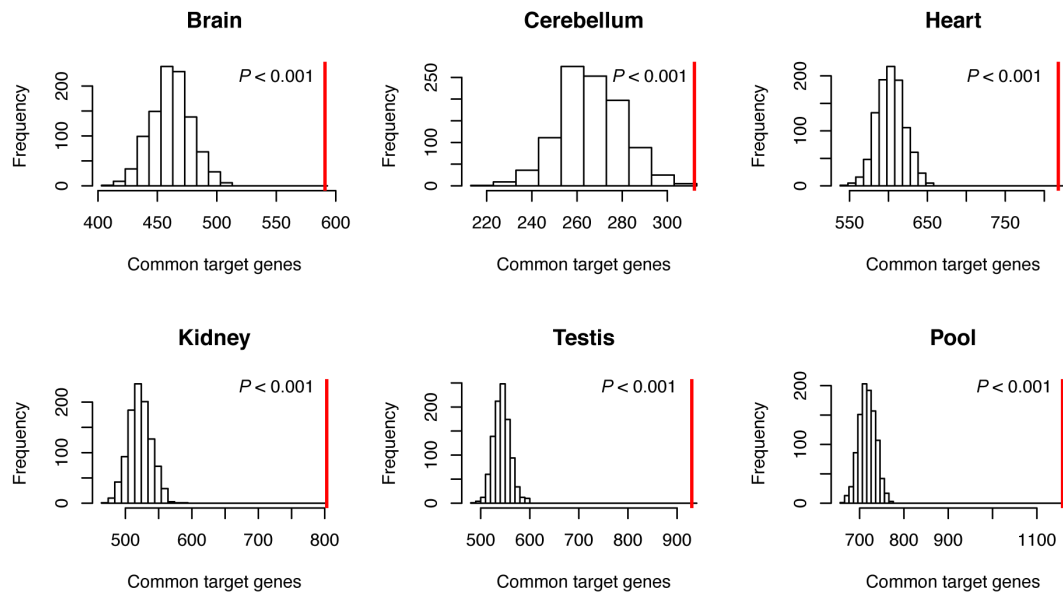

1

2 **Figure 2.** Permutation analysis of common target genes of miRNAs from the same cluster in  
3 each tissue or pooled data by shuffling co-expressed seed:target pairs. Similar as Fig. 1 but  
4 *miR-182/183/96* cluster was excluded in the analysis.

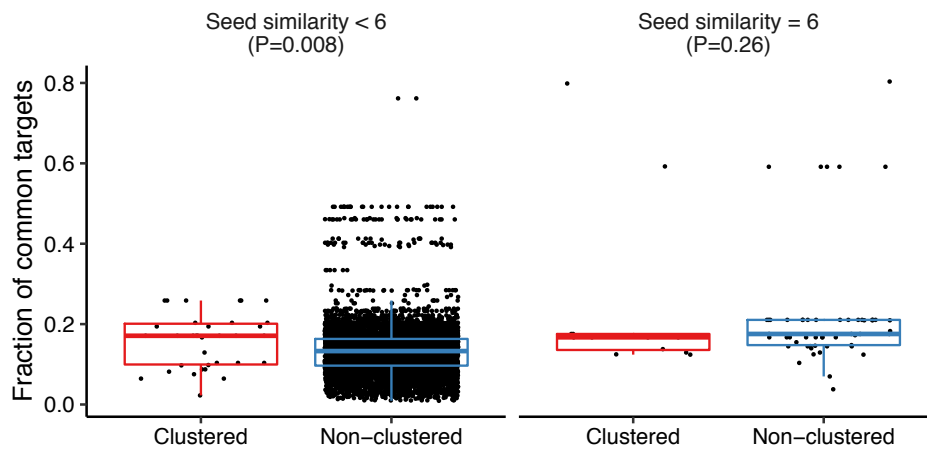

5

6 **Figure 3.** The distribution of the fraction of common targets for a pair of miRNAs that are from  
7 the same cluster (Clustered) or not (Non-clustered). Paired miRNAs with a seed similarity less  
8 than or equal to six nucleotides were compared separately with the Wilcoxon rank-sum tests.

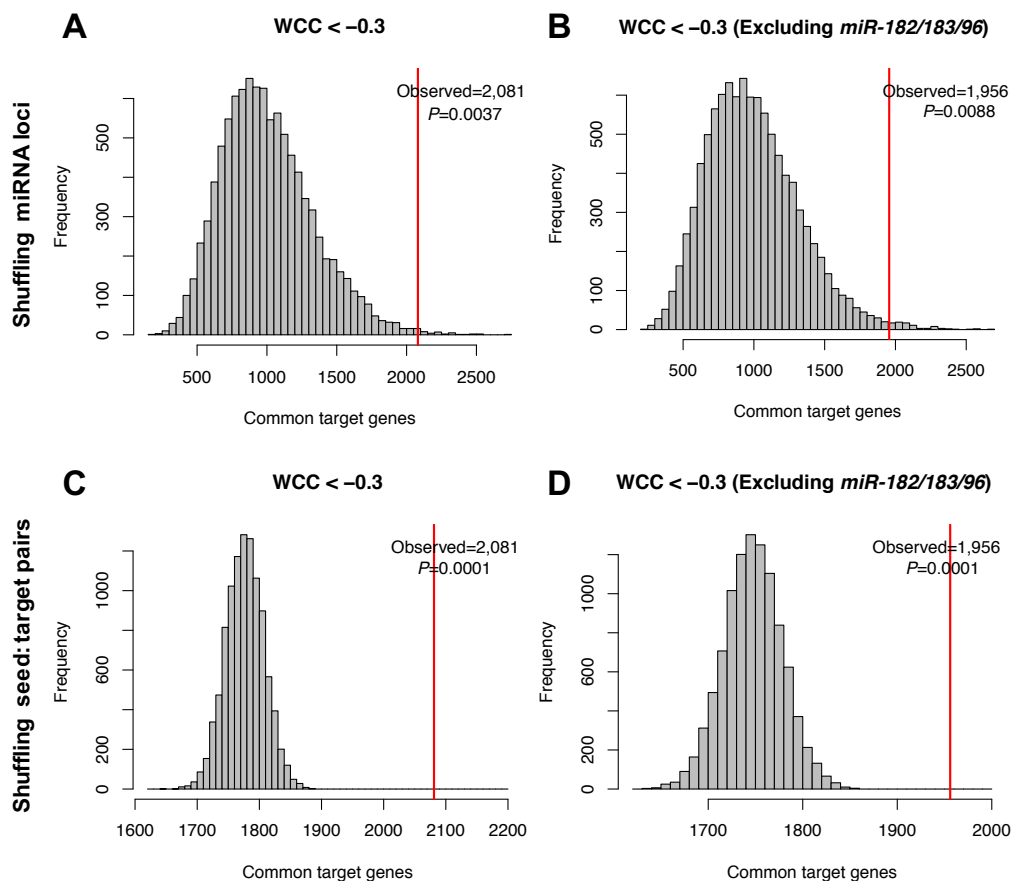

1

2 **Figure 4.** Permutation analysis of common target genes of clustered miRNAs. (A and B)  
3 Permutation analysis by shuffling miRNA loci using miRNA target genes with weighted  
4 context score++ (WCC) < -0.3 before (A) or after (B) excluding *miR-182/183/96* cluster. (C  
5 and D) Permutation analysis by shuffling co-expressed seed: target pairs using miRNA target  
6 genes with WCC < -0.3 before (C) or after (D) excluding *miR-182/183/96* cluster. All the  
7 human miRNAs and their targets with WCC < -0.3 were analyzed. Only co-expressed  
8 miRNA:target pairs in human tissues were considered. 10,000 replicates were performed for  
9 each permutation test. The observed numbers of common targets were indicated with red lines.  
10 The empirical *P* value was calculated as the fraction of simulations yielding a number of  
11 common targets larger than the observed one.

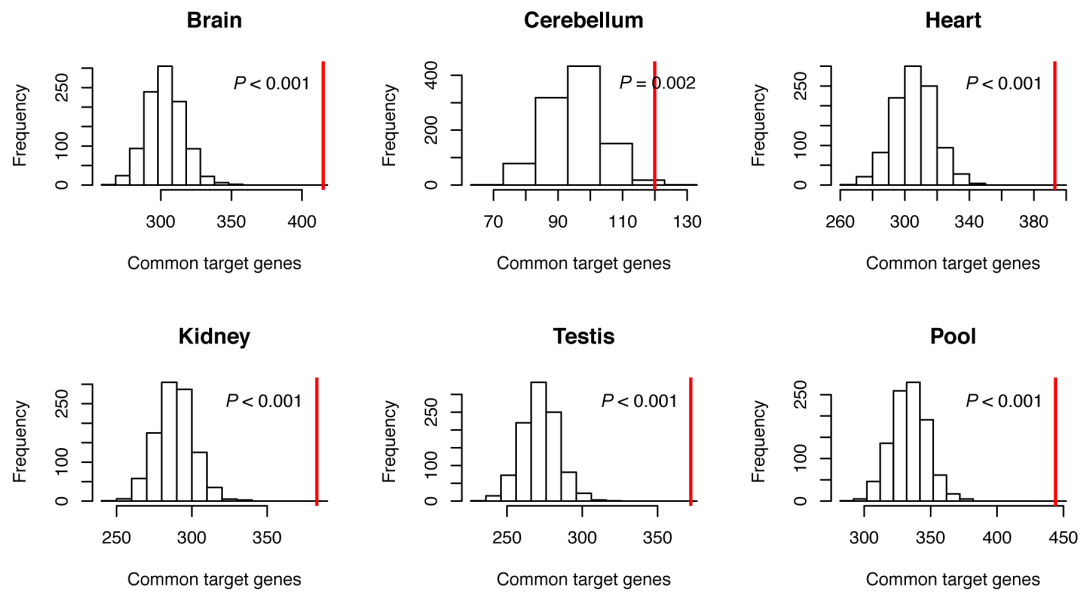

1

2 **Figure 5.** The number of observed (red) and simulated common target genes of conserved  
3 miRNAs in *mir-17~92* cluster in the permutation analysis of Fig. 1.
